# Supplementary material
Source: Springer Nature journal article supplement (https://www.springermedizin.de/resource/supplementary/12986_2009_228_MOESM4_ESM.pdf/25655632)

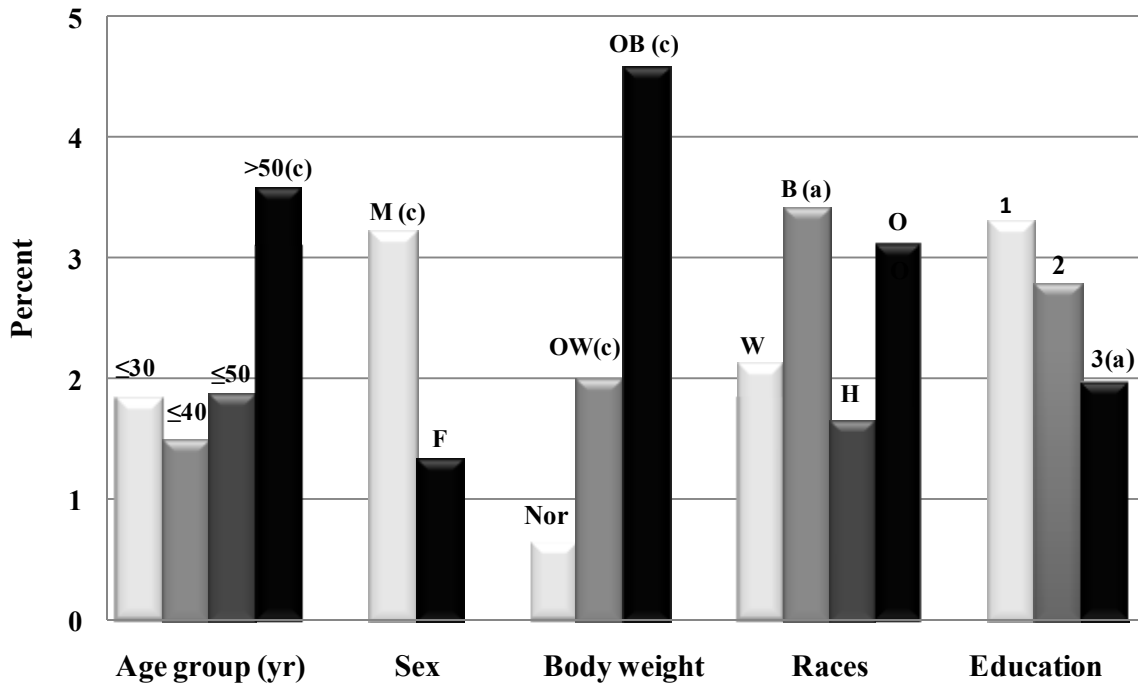

Supplement: MOESM4 [file 25655632]
